# Supplementary material for: Multifaceted and Intricate Oncogenic Mechanisms of NDRG1 in Head and Neck Cancer Depend on Its C-Terminal 3R-Motif
Source: MDPI journal article supplement (doi:10.3390/cells11091581), 2022-05-07
Supplement: s1 [file s1]

## Supplementary Material:

### Multifaceted and intricate oncogenic mechanisms of NDRG1 in head and neck cancer depend on its C-terminal 3R-motif

Guo-Rung You, Joseph T. Chang, Hsiao-Fan Li, Ann-Joy Cheng

**Figure S1**

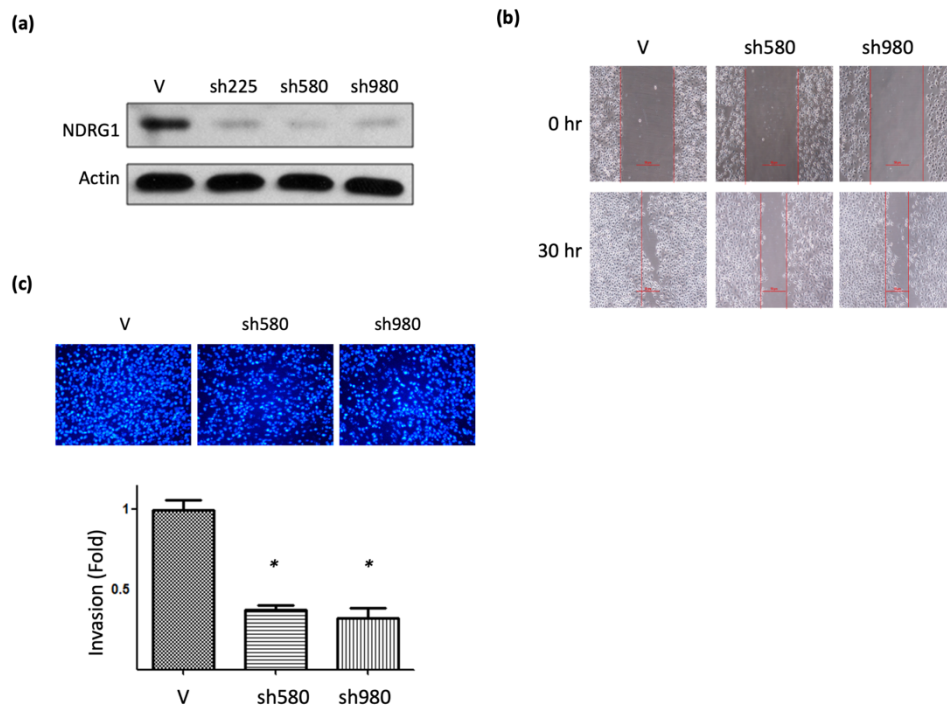

**Figure S1.** Silencing NDRG1 inhibited cell migration and invasion in OECM1 cells. (a) Knockdown efficiency of NDRG1-shRNA in OECM1 cells. V: pGSH1-GFP, sh225: pGSH1-sh225, pGSH1-sh580, pGSH1-sh980 (Specific NDRG1-shRNA oligonucleotides were be cloned into pGSH1-GFP vector. (pGSH1-GFP-sh225: 5'-gau ccg agu uug aug ucc agg agc gaagcuug gcu ccu gga cau caa acu cgg auc uu-3'; pGSH1-GFP-sh580: 5'-gau ccc tcg auu ugc ucu aaa caa gaagcuug uug uuu aga gca aau cga agg gau cuu-3', pGSH1-GFP-sh980: 5'-gau ccg aga cca cuc ucc uca aga gaagcuug ucu uga gga gag ugg ucu cgg auc uu-3'). (b) Silencing NDRG1 in OECM1 cells decreased the cell motility, as determined by the wound-healing migration assay. (c) Silencing NDRG1 in OECM1 cells inhibited cell invasion behavior, as determined by Matrigel

invasion assay. The error bars shown in the relevant figures indicated the standard deviation of the quantification results in all experiments. (\*  $p < 0.05$ ;  $t$ -test).

**Table S1. List of primers used for RT-qPCR analysis.**

| <b>Gene</b> | <b>Primer Sequences (5' -&gt; 3')</b>                     |
|-------------|-----------------------------------------------------------|
| Twist1      | F: GAGTCCGCAGTCTTACGAGG<br>R: CTGCCCCGTCTGGGAATCACT       |
| BMI1        | F: GCTGCCAATGGCTCTAATGAA<br>R: TGCTGGGCATCGTAAGTATCTT     |
| NES         | F: CTGCTACCCTTGAGACACCTG<br>R: GGGCTCTGATCTCTGCATCTAC     |
| c-Met       | F: AGCAATGGGGAGTGTAAGAGG<br>R: CCCAGTCTTGTACTCAGCAAC      |
| ABCG2       | F: CAGGTGGAGGCAAATCTTCGT<br>R: ACCCTGTTAATCCGTTTCGTTTT    |
| Fibronectin | F: GGTGACACTTATGAGCGTCCTAAA<br>R: TACAATCTACCATCATCCAGCCT |
| Vimentin    | F: TGGCACGTCTTGACCTTGAA<br>R: GGTCATCGTGATGCTGAGAA        |
| N-cadherin  | F: GACAATGCCCCTCAAGTGTT<br>R: CCATTAAGCCGAGTGATGGT        |

**Table S2. List of antibodies used for western blot studies.**

| <b>Primary antibody</b>    | <b>Provider</b> | <b>Species</b> | <b>Reference</b> |
|----------------------------|-----------------|----------------|------------------|
| NDRG1                      | abcam           | Mouse          | ab56697          |
| GAPDH                      | EMD Millipore   | Mouse          | MAB374           |
| CD44                       | Agent           | Mouse          | AM1901b          |
| Twist1                     | Santa Cruz      | Rabbit         | SC-15393         |
| Fibronectin                | Santa Cruz      | Mouse          | SC-18825         |
| Vimentin                   | abcam           | Rabbit         | ab8978           |
| Phosphoserine              | abcam           | Mouse          | ab6639           |
| GFP                        | abcam           | Mouse          | ab290            |
| HDAC1                      | Upstate         | Mouse          | 05-614           |
| <b>Secondary antibody</b>  | <b>Provider</b> | <b>Species</b> | <b>Reference</b> |
| Goat anti-mouse IgG-HRP    | Santa Cruz      | Goat           | SC-2005          |
| Anti-rabbit IgG HRP-linked | Cell signaling  | Goat           | 7074             |

**Table S3.** Top 50 up-regulated and top 50 down-regulated genes in NDRG1 over-expressing OECM1 cells.

| Type | Gene Symbol | Description                                           | Fold Change |
|------|-------------|-------------------------------------------------------|-------------|
| Up   | C9orf64     | chromosome 9 open reading frame 64                    | 28.078      |
| Up   | EIF1AY      | eukaryotic translation initiation factor 1A, Y-linked | 19.534      |
| Up   | FLRT3       | fibronectin leucine rich transmembrane protein 3      | 16.941      |
| Up   | CALB1       | calbindin 1                                           | 15.960      |
| Up   | CYorf15B    | chromosome Y open reading frame 15B                   | 14.659      |
| Up   | CASP14      | caspase 14                                            | 11.447      |
| Up   | DAPK1       | death-associated protein kinase 1                     | 10.876      |
| Up   | SLC47A1     | solute carrier family 47, member 1                    | 7.007       |
| Up   | KCNMA1      | potassium large conductance calcium-activated channel | 6.965       |
| Up   | CTSH        | cathepsin H                                           | 6.850       |
| Up   | LOC440173   | hypothetical LOC440173                                | 6.751       |
| Up   | TNC         | tenascin C                                            | 6.707       |
| Up   | MCART1      | mitochondrial carrier triple repeat 1                 | 6.203       |
| Up   | HCLS1       | hematopoietic cell-specific Lyn substrate 1           | 5.751       |
| Up   | NLGN4Y      | neuroligin 4, Y-linked                                | 5.492       |
| Up   | ADRBK2      | adrenergic, beta, receptor kinase 2                   | 5.476       |
| Up   | TRIB2       | tribbles homolog 2                                    | 5.353       |
| Up   | CIT         | citron                                                | 5.333       |
| Up   | TIMP3       | TIMP metalloproteinase inhibitor 3                    | 4.930       |
| Up   | RRM2        | ribonucleotide reductase M2                           | 4.867       |
| Up   | MLF1        | myeloid leukemia factor 1                             | 4.846       |
| Up   | KNTC1       | kinetochore associated 1                              | 4.758       |
| Up   | CLSPN       | claspin homolog                                       | 4.740       |
| Up   | MCM10       | minichromosome maintenance complex component 10       | 4.622       |
| Up   | FAM58A      | family with sequence similarity 58                    | 4.605       |
| Up   | MCM8        | minichromosome maintenance complex component 8        | 4.507       |
| Up   | ETV5        | ets variant 5                                         | 4.397       |
| Up   | CKS2        | CDC28 protein kinase regulatory subunit 2             | 4.393       |
| Up   | NAT5        | N-acetyltransferase 5                                 | 4.354       |
| Up   | CDC6        | cell division cycle 6                                 | 4.334       |
| Up   | DPYSL3      | dihydropyrimidinase-like 3                            | 4.251       |
| Up   | FANCA       | Fanconi anemia                                        | 4.241       |
| Up   | SHCBP1      | SHC SH2-domain binding protein 1                      | 4.152       |
| Up   | SULF2       | sulfatase 2                                           | 4.085       |
| Up   | FAM111B     | family with sequence similarity 111, member B         | 4.077       |

|       |          |                                                 |         |
|-------|----------|-------------------------------------------------|---------|
| Up    | SLC23A2  | solute carrier family 23                        | 4.076   |
| Up    | RPS27L   | ribosomal protein S27-like                      | 4.060   |
| Up    | PBK      | PDZ binding kinase                              | 3.984   |
| Up    | C11orf82 | chromosome 11 open reading frame 82             | 3.983   |
| Up    | CHST10   | carbohydrate sulfotransferase 10                | 3.973   |
| Up    | CHEK1    | CHK1 checkpoint homolog                         | 3.925   |
| Up    | KCNJ2    | potassium inwardly-rectifying channel           | 3.881   |
| Up    | PCNA     | proliferating cell nuclear antigen              | 3.792   |
| Up    | MKKS     | McKusick-Kaufman syndrome                       | 3.761   |
| Up    | RNASEH2A | ribonuclease H2, subunit A                      | 3.705   |
| Up    | WDHD1    | WD repeat and HMG-box DNA binding protein 1     | 3.691   |
| Up    | PDZK1IP1 | PDZK1 interacting protein 1                     | 3.678   |
| Up    | TSHZ2    | teashirt zinc finger homeobox 2                 | 3.674   |
| Up    | UNQ5815  | UNQ5815                                         | 3.672   |
| Up    | C20orf72 | chromosome 20 open reading frame 72             | 3.623   |
| <hr/> |          |                                                 |         |
| Down  | OAS2     | 2'-5'-oligoadenylate synthetase 2               | -39.198 |
| Down  | STARD4   | StAR-related lipid transfer domain containing 4 | -22.281 |
| Down  | MPPED2   | metallophosphoesterase domain containing 2      | -20.748 |
| Down  | GBP4     | guanylate binding protein 4                     | -15.588 |
| Down  | IL7R     | interleukin 7 receptor                          | -14.839 |
| Down  | TRIM31   | tripartite motif-containing 31                  | -13.282 |
| Down  | LIPH     | lipase, member H                                | -12.233 |
| Down  | MX2      | myxovirus resistance 2                          | -12.106 |
| Down  | GBP1     | guanylate binding protein 1                     | -11.326 |
| Down  | STRA6    | stimulated by retinoic acid gene 6              | -10.255 |
| Down  | GCNT4    | glucosaminyl (N-acetyl) transferase 4           | -9.631  |
| Down  | TRIM22   | tripartite motif-containing 22                  | -9.317  |
| Down  | SLC16A14 | solute carrier family 16                        | -9.164  |
| Down  | BMP5     | bone morphogenetic protein 5                    | -9.061  |
| Down  | PSG9     | pregnancy specific beta-1-glycoprotein 9        | -8.860  |
| Down  | AIM2     | absent in melanoma 2                            | -8.859  |
| Down  | ZNF91    | zinc finger protein 91                          | -8.087  |
| Down  | UBA7     | ubiquitin-like modifier activating enzyme 7     | -8.069  |
| Down  | HERC5    | hect domain and RLD 5                           | -8.024  |
| Down  | SAMD9L   | sterile alpha motif domain containing 9-like    | -7.845  |
| Down  | KRT13    | keratin 13                                      | -7.813  |
| Down  | MDK      | midkine                                         | -7.708  |
| Down  | LOXL4    | lysyl oxidase-like 4                            | -7.252  |

|      |          |                                                |        |
|------|----------|------------------------------------------------|--------|
| Down | TMEM156  | transmembrane protein 156                      | -6.960 |
| Down | CDH10    | cadherin 10, type 2                            | -6.906 |
| Down | SEMA3E   | sema domain                                    | -6.647 |
| Down | TET1     | tet oncogene 1                                 | -6.521 |
| Down | ZNF675   | zinc finger protein 675                        | -6.428 |
| Down | SCNN1A   | sodium channel, nonvoltage-gated 1 alpha       | -6.371 |
| Down | CD24     | CD24 molecule                                  | -6.248 |
| Down | PSMB9    | proteasome subunit, beta type, 9               | -6.247 |
| Down | IRF1     | interferon regulatory factor 1                 | -6.179 |
| Down | FLJ13744 | hypothetical FLJ13744                          | -5.986 |
| Down | SYT14    | synaptotagmin XIV                              | -5.885 |
| Down | PARP14   | poly (ADP-ribose) polymerase family, member 14 | -5.865 |
| Down | PLAU     | plasminogen activator, urokinase               | -5.863 |
| Down | IFI44    | interferon-induced protein 44                  | -5.667 |
| Down | CPN1     | carboxypeptidase N, polypeptide 1              | -5.599 |
| Down | GRAMD1C  | carboxypeptidase N, polypeptide 1              | -5.562 |
| Down | SLC2A12  | solute carrier family 2                        | -5.507 |
| Down | SERPINB1 | serpin peptidase inhibitor,clade B             | -5.452 |
| Down | PLAC8    | placenta-specific 8                            | -5.426 |
| Down | IFIH1    | interferon induced with helicase C domain 1    | -5.417 |
| Down | SLC6A9   | solute carrier family 6                        | -5.414 |
| Down | PPP1R12B | protein phosphatase 1, regulatory subunit 1    | -5.414 |
| Down | ANKRD36B | ankyrin repeat domain 36B                      | -5.361 |
| Down | TRIML2   | tripartite motif family-like 2                 | -5.228 |
| Down | LPHN2    | latrophilin 2                                  | -5.209 |
| Down | C4orf33  | chromosome 4 open reading frame 33             | -5.189 |
| Down | CLEC7A   | C-type lectin domain family 7                  | -5.170 |

---
